1 **MicroRNA-202 (*miR-202*) controls female fecundity by**  
2 **regulating medaka oogenesis**

3

4 **Short title**

5 Fish oogenesis and microARN-202

6

7 Stéphanie Gay, Jérôme Bugeon, Amine Bouchareb, Laure Henry, Jérôme Montfort,  
8 Aurélie Le Cam, Julien Bobe, Violette Thermes\*

9

10 LPGP (Fish Physiology and Genomics Institute), INRA, 35042 Rennes, France

11

12 E-mail: [violette.thermes@inra.fr](mailto:violette.thermes@inra.fr)

13

14

15

16 Key words

17 Fish fertility, ovary, gonads, microRNAs, CRSIPR/Cas9, quantitative image analyses,  
18 microarray

## 1 **ABSTRACT**

2 Female gamete production relies on coordinated molecular and cellular processes that  
3 occur in the ovary throughout oogenesis. In fish, as in other vertebrates, these processes  
4 have been extensively studied both in terms of endocrine/paracrine regulation and  
5 protein expression and activity. The role of small non-coding RNAs in the regulation of  
6 animal reproduction remains however largely unknown and poorly investigated, despite  
7 a growing interest for the importance of miRNAs in a wide variety of biological  
8 processes. Here, we analyzed the role of *miR-202*, a miRNA predominantly expressed in  
9 male and female gonads in several vertebrate species. We studied its expression in the  
10 medaka ovary and generated a mutant line (using CRISPR/Cas9 genome engineering) to  
11 determine its importance for reproductive success with special interest for egg  
12 production. Our results show that miR-202-5p is the biologically active form of the  
13 miRNA and that it is expressed in granulosa cells and in the unfertilized egg. The knock  
14 out (KO) of *miR-202* resulted in a strong phenotype both in terms of number and quality  
15 of eggs produced. Mutant females exhibited either no egg production or produced a  
16 drastically reduced number of eggs that could not be fertilized, ultimately leading to no  
17 reproductive success. We quantified the size distribution of the oocytes in the ovary of  
18 KO females and performed a genome-wide transcriptomic analysis approach to  
19 identified dysregulated molecular pathways. Together, cellular and molecular analyses  
20 indicate that lack of *miR-202* impairs the early steps of oogenesis/folliculogenesis and  
21 decreases the number of large (*i.e.* vitellogenic) follicles, ultimately leading to  
22 dramatically reduced female fecundity. This study sheds new light on the regulatory  
23 mechanisms that control the early steps of follicular development and provides the first

1 *in vivo* functional evidence that an ovarian-predominant microRNA may have a major  
2 role in female reproduction.

### 3 **Author summary**

4 The role of small non-coding RNAs in the regulation of animal reproduction remains  
5 poorly investigated, despite a growing interest for the importance of miRNAs in a wide  
6 variety of biological processes. Here, we analyzed the role of *miR-202*, a miRNA  
7 predominantly expressed in gonads in vertebrate. We studied its expression in the  
8 medaka ovary and knocked out the *miR-202* genes to study its importance for  
9 reproductive success. We showed that the lack of *miR-202* results in the sterility of both  
10 females and males. In particular, it lead to a drastic reduction of both the number and  
11 the quality of eggs produced by females. Mutant females exhibited either no egg  
12 production or produced a drastically reduced number of eggs that could not be  
13 fertilized, ultimately leading to no reproductive success. Quantitative histological and  
14 molecular analyses indicated that *miR-202* KO impairs oocyte development and is also  
15 associated with the dysregulation of many genes that are critical for reproduction. This  
16 study sheds new light on the regulatory mechanisms that control oogenesis and  
17 provides the first *in vivo* functional evidence that an ovarian-predominant microRNA  
18 may have a major role in female reproduction.

19

## 1 INTRODUCTION

2 In fish, female fecundity is tightly linked to the proper completion of oogenesis in the ovary,  
3 whereby undifferentiated germinal stem cells undergo meiosis, a dramatic increase in size  
4 and ultimately form the eggs (1). Such an important differentiation processes requires  
5 coordinated interactions between the oocyte and the surrounding somatic cells (granulosa  
6 and theca cells), which together form the ovarian follicles (2). While the role of endocrine  
7 and intra-ovarian factors in these processes has been extensively studied, the regulation by  
8 the small non-coding RNAs (microRNAs) has received far less attention (3)(4).

9 MicroRNAs (approximately 22 nucleotides in length) play many different biological  
10 functions through the post-transcriptional regulation of protein-coding genes. In  
11 mammals, most researches that investigate the role of miRNAs in the ovary have mainly  
12 relied on *in vitro* analyses. Numerous studies that have highlighted the role played by  
13 miRNAs in ovarian development and oogenesis, as shown for miR-224 (5)(6)(7). In  
14 contrast, data documenting the role played by miRNAs in fish reproduction remain  
15 scarce and mainly rely on expression studies. In zebrafish, the expression and regulation  
16 of specific miRNAs has been associated with vitellogenesis and follicular development  
17 (8). More specifically, expression and regulation of miR-17 and miR-430b in the ovary  
18 suggest a role in follicular development and oocyte maturation. Large scale differential  
19 transcriptomic analyses were also performed during sex differentiation, gonadal  
20 development or vitellogenesis in various fish species, including rainbow trout (9),  
21 zebrafish (10)(11), Atlantic halibut (12), yellow cat fish (13), Tilapia (14)(15) and  
22 medaka (16)(17). The identification of differentially expressed miRNAs through the  
23 different stages of the reproductive cycle is consistent with a participation of miRNAs in

1 oogenesis and spermatogenesis. Among the most abundantly expressed miRNA was  
2 *miR-202*, a miRNA known to be predominantly expressed in gonads in several vertebrate  
3 species, including frog (18), Atlantic halibut (19), human, mouse, rat (20)(21), chicken  
4 (22)(23), rainbow trout (24) and medaka (25). For protein-coding genes, such a  
5 predominant expression in gonads is usually associated with a major role in  
6 reproduction, as illustrated by many maternal-effect genes (26). There is however no  
7 functional evidence of the major role in fish reproduction of either *miR-202* or any other  
8 gonad-predominant miRNAs, although some recent *in vitro* studies reported a role for  
9 *miR-202* in mouse during spermatogenesis (27). Furthermore, it is currently unknown if  
10 such a critical feature, observed for protein-coding genes, would also be observed for  
11 miRNAs that are usually seen only as fine modulators of gene regulatory networks  
12 rather than major regulators of biological processes (28).

13 Here, we investigated the role of *miR-202* in fish reproduction with special attention for  
14 its role in the ovary. We thoroughly analyzed its cellular expression within the ovary and  
15 characterized the reproductive phenotype of *miR-202* knock-out (KO) fish, generated by  
16 CRISPR/Cas9 genome engineering. We showed that miR-202-5p is the predominant  
17 mature form expressed in granulosa cells. The lack of miR-202 resulted in a dramatic  
18 decrease of fertility in both male and females. In females, both egg number and quality  
19 were reduced, ultimately leading to the absence of any viable offspring. Quantitative  
20 image analysis of mutant ovaries showed that *miR-202* impairs the early steps of  
21 oogenesis/folliculogenesis. Along with this drastic phenotype, we observed the  
22 dysregulation of several key genes known for their role throughout oogenesis, as well as  
23 the dysregulation of genes, the role of which is not yet known in the ovary. Overall, this  
24 study sheds new light on the regulatory mechanisms that control the early steps of

1 follicular development and provides the first *in vivo* functional evidence that an ovarian-  
2 predominant microRNA has a major role in female reproduction.

### 3 **RESULTS**

#### 4 **MiR-202-5p is highly expressed in granulosa cells**

5 The medaka miR-202 gene harbors two mature miRNAs sequences, miR-202-5p and  
6 miR-202-3p (Fig 1A), whose expression levels were surveyed by quantitative reverse  
7 transcription TaqMan PCR (TaqManPCR) in eleven different tissues of adult fish and  
8 during embryonic development. The miR-202-5p mature form was found specifically  
9 expressed at high levels in both gonads (*i.e.* ovary and testis), in comparison to all other  
10 tissues (Fig 1B). During embryonic development, the highest expression levels of miR-  
11 202-5p were detected in non-fertilized eggs at stage 0 (st.0), thus corresponding to a  
12 maternal accumulation (Fig 1C). Lower levels of miR-202-5p were detected from the  
13 one-cell stage (st.2) onward. A slight increased expression was detected just before  
14 hatching (st.39), likely corresponding to a zygotic transcription. The miR-202-3p mature  
15 form presented similar expression profiles in adult tissues but expression levels were  
16 approximately 1500 times lower in ovary and testis, in comparison to miR-202-5p and  
17 undetectable in other tissues. During development, miR-202-3p also exhibited a profile  
18 similar to the -5p form and could be detected in unfertilized eggs at levels 500 times  
19 lower, while it could not be detected above background levels at any other  
20 developmental stages (data not shown).

21 The cellular expression pattern of *miR-202* was analyzed in the ovary by fluorescent *in*  
22 *situ* hybridization (FISH) on ovarian sections (Fig 2). Ovaries were dissected either from  
23 juvenile females (*i.e.* before the first spawning) or from adult females (*i.e.* reproductively

1 active fishes). In both juvenile and adult ovaries, miR-202-5p was detected in follicles at  
2 all vitellogenic and post-vitellogenic stages, in granulosa cells surrounding the oocyte  
3 (Figs 2A' and 2B', arrowhead), but not in theca cells (Figs 2A' and 2B'', arrow). To  
4 visualize *sox9*-expressing cells in the germinal cradle, we performed FISH on ovaries  
5 from adult transgenic medaka *Tg(sox9b::EGFP)*. MiR-202-5p was detected in a subset of  
6 GFP-positive cells surrounding early pre-vitellogenic follicles (primordial follicles, Fig  
7 2B'''). FISH performed with a specific MiR-202-3p probe (Fig 2C, D) or with a scramble  
8 control probe (S1 Fig) revealed no detectable signal above background.

### 9 ***MiR-202* knock-out drastically reduces female fertility**

10 To determine the role of miR-202 on female reproduction, we inactivated the *miR-202*  
11 gene using the CRISPR/Cas9 technology. Small insertion/deletion (INDEL) mutations  
12 were inserted in the genome, in the miR-202-3p mature sequence (Fig 3A). Fishes  
13 displaying the same INDEL (-7+3) were selected to establish a mutant fish line. In  
14 homozygotes mutants (*miR-202*<sup>-/-</sup>), the processing of the pri-miR-202 was impaired and  
15 the miR-202-5p mature form was absent (Fig 3B). The sex ratio for both heterozygous  
16 and homozygous was the same as in wild-type siblings. This mutant line was used in all  
17 further experiments.

18 We thoroughly analyzed the reproductive phenotype of *miR-202*<sup>-/-</sup> adult females. The  
19 frequency of spawning was analyzed during ten consecutive cycles (Fig 3C). Two  
20 categories of mutant females were distinguishable by different reproductive  
21 phenotypes. The mildly affected females (subfertile females), which represented 85% of  
22 all mutant females analyzed, displayed an irregular frequency of spawning compared to  
23 wild-type females that spawned every day within one hour of the onset of the light. The

1 most strongly affected females (sterile females), which represented 15% of all mutant  
2 females analyzed, spawned only once in ten days. Further analysis of the quantity of  
3 spawned eggs (female fecundity) revealed that subfertile females spawned a  
4 significantly reduced number of eggs (5.8 eggs per clutch on average) compared to wild-  
5 type females (18.8 eggs per clutch on average, Fig 3D). In addition, the viability of  
6 embryos (*i.e.* capability of eggs to be fertilized and to develop correctly) was  
7 dramatically reduced when subfertile females were outcrossed with wild-type males  
8 (Fig 3E). Similar results were obtained when subfertile females were mated with mutant  
9 males. Conversely, when mutant males were outcrossed with wild-type females, the  
10 viability of embryos was also drastically affected compared to wild-type siblings.  
11 Further analysis of siblings revealed that, eggs originating from subfertile females  
12 fertilized by either a wild-type or a mutant male could not be fertilized, while eggs  
13 originating from wild-type females fertilized by a mutant male were fertilized but  
14 arrested during the first cleavage stages of embryonic development (st.4-5, Fig 3F). The  
15 overall reproductive success of mutant females was therefore reduced to 0.83 viable  
16 eggs per clutch for subfertile females (*i.e.* mutant females that exhibited irregular  
17 spawning, reduced fecundity and low embryonic survival) and to zero viable egg for  
18 sterile females that exhibited the most severe phenotype, while wild-type female  
19 exhibited an average of 15.3 viable eggs per clutch. To maintain the mutant fish line  
20 (INDEL -7+3), heterozygous fishes were thus systematically outcrossed with wild-type fishes  
21 at each generation (see Material and Methods). Another mutant line harboring another  
22 INDEL mutation (-8) was used to confirm this reproductive phenotype but this line was  
23 not used for further histological and molecular phenotyping analyses (data not shown).



1 Altogether, our results indicate that *miR-202* is required for the formation of functional  
2 gametes in both female and male gonads.

### 3 ***MiR-202* knock-out affects the early steps of follicular growth in juvenile** 4 **females**

5 We further analyzed the role of *miR-202* during oogenesis in juvenile females (*i.e.* before  
6 the first spawning). To this aim, the follicular content of wild-type and mutant ovaries  
7 were analyzed and compared. For each ovary, the number and size of follicles were  
8 determined on the median ovarian section. Nuclei of somatic cells, including granulosa  
9 cells surrounding each oocyte, were stained with DAPI, which allowed delineating all  
10 follicles and automatically individualizing them, using a computational automatic  
11 segmentation procedure (Fig 4A). The section area, the mean follicle diameter and the  
12 number of follicles were determined (Fig 4B). In *miR-202*<sup>-/-</sup> ovarian sections, the mean  
13 follicular diameter was significantly reduced (70  $\mu\text{m}$ ), as compared to wild-type ovarian  
14 sections (80  $\mu\text{m}$ ), and the number of follicles appeared higher (500  $\mu\text{m}$ ) as compared to  
15 wild-type (300  $\mu\text{m}$ ), although not significantly. These data suggest an impairment of the  
16 early follicular growth in juvenile mutant ovaries.

17 The size distribution of follicles on sections was thoroughly analyzed in mutant and  
18 wild-type ovaries. Follicles were classified according to their diameter into five different  
19 classes (<50  $\mu\text{m}$ , 50-100  $\mu\text{m}$ , 100-150  $\mu\text{m}$ , 150-200  $\mu\text{m}$  and 200-350  $\mu\text{m}$ ) (Fig 4C).  
20 Comparison of the resulting profiles revealed different size distributions profiles in  
21 mutant and wild-type ovaries. In mutant ovarian sections, the number of small follicles  
22 appeared higher compared to wild-type, with a significant increased in the 50-100  $\mu\text{m}$   
23 size class, whereas the number of follicles in the larger diameter class (200-350  $\mu\text{m}$ )

1 tended to decrease, although not significantly. This clearly suggests an important defect  
2 of the early follicular growth in juvenile *miR-202*<sup>-/-</sup> females, leading to an accumulation  
3 of small and medium oocytes (*i.e.* pre-vitellogenic and early-vitellogenic oocytes) to the  
4 detriment of larger late-vitellogenic and maturing follicles.

## 5 ***MiR-202* knock-out decreases the number of growing follicles in subfertile** 6 **adult females**

7 The role of *miR-202* during oogenesis was analyzed at the adult stage (reproductively  
8 active fish), in both subfertile and sterile females (Fig 5A). Section areas, mean follicular  
9 diameters and numbers of follicles were measured on median sections. The follicular  
10 size distribution was also analyzed. Follicles were classified according to their diameter  
11 into three different size classes based on their diameter: small (<100  $\mu\text{m}$ ), medium  
12 (100-400  $\mu\text{m}$ ) and large (400-1200  $\mu\text{m}$ ). In sterile females, ovaries displayed a  
13 significant decrease of the mean follicular diameter (170  $\mu\text{m}$ ) in comparison to wild-  
14 type ovaries (220  $\mu\text{m}$ ), but similar numbers of follicles were found in both cases.  
15 Consistently, ovarian sections were significantly reduced in mutant compared to wild-  
16 type (Fig 5B). The analysis of the size distributions also revealed distinct profiles in  
17 wild-types and mutants. The number of large follicles (>400  $\mu\text{m}$ ) was significantly  
18 reduced in mutant, while small follicles (<100  $\mu\text{m}$ ) tended to accumulate, although not  
19 significantly (Fig 5C). These observations suggest a strong impairment of the early steps  
20 of the follicular growth in sterile females, similarly to juvenile mutant females analyzed  
21 during the first reproductive cycle (see above).

22 In subfertile females, which exhibited a milder reproductive phenotype (*i.e.* occurrence  
23 of spawning but a reduced number of eggs and reduced egg survival), ovarian sections

1 displayed a significantly reduced number of follicles. This was associated with a  
2 significant reduction of ovarian section areas (Fig 5B). No modification of the mean  
3 follicular diameter was however observed, suggesting that although fewer follicles were  
4 engaged into growth, they were all able to reach their correct final size. This was  
5 supported by the follicular size distribution profiles, which showed a significant and  
6 important reduction of the number of medium-size follicles (100-400  $\mu\text{m}$  in diameter)  
7 in mutant compared to wild-type, and no accumulation of small-size follicles (<100  $\mu\text{m}$   
8 in diameter, Fig 5C). These data likely reflect a milder effect of the *miR-202* deficiency on  
9 follicular growth in subfertile adult females compared to sterile fishes, indicating a  
10 partial recovery of the phenotype at this stage.

### 11 **Genome-wide analysis reveals major dysregulation of key ovarian genes**

12 To get further insight into the molecular pathways that are affected in absence of miR-  
13 202, we performed a genome-wide transcriptomic analysis on ovaries of wild-type and  
14 *miR-202*<sup>-/-</sup> females. This analysis was conducted on ovaries from juvenile females,  
15 before the first spawning, when ovaries display a more homogenous follicle population  
16 (from 30 to 350  $\mu\text{m}$  in diameter) compared to ovaries from reproductively active adult  
17 fish (from 30 to 1100  $\mu\text{m}$  in diameter, see Figs 4 and 5). We identified 52 differentially  
18 expressed genes, including 11 genes that were up-regulated in mutant and 41 genes  
19 down-regulated in mutant (S1 Table). The most differentially expressed genes were  
20 validated by QPCR (*wnt2bb*, *wnt4a*, *klhl23*, *setd4*, *npr1b* and *srgap3*) along with other  
21 major genes involved in fish oogenesis selected from the literature (*cyp19a1a*, *cyp17*,  
22 *gsdf*, *inh*, *foxl2b*, *symp3*, *foxl3*, *Sox9b*, *olvas*). Results are shown on figure 6 and are  
23 described below.

1 **Down-regulation of known genes expressed in the somatic germ-cell supporting cells (Fig**  
2 **6A)**

3 Expression analysis revealed a marked expression decrease of two genes encoding key  
4 steroidogenic enzymes (*cyp19a1a* and *cyp17*). *Cyp19a1a* (also known as aromatase) is  
5 an ovarian-specific steroidogenic enzyme that mediates estradiol (E2) production and  
6 therefore plays a major role in both sex differentiation and vitellogenesis (Lubzens et al.  
7 2010, for review). An even more pronounced under-expression was observed for *cyp17*  
8 that acts upstream of *cyp19a1a*. Consistently, data obtained from microarray analysis  
9 also revealed the down-regulation of the *steroidogenic acute regulatory* gene (*star*, S1  
10 Table). *Star* is involved in the cholesterol shuttling across the inner mitochondrial  
11 membrane, which is a rate-limiting step of the steroidogenesis (29)(30). A decrease in  
12 *star* expression indicates an overall decrease in ovarian steroidogenic production.

13 We also observed the down-regulation of *gsdf* and *inhibin*, two members of the TGF $\beta$   
14 family, in the ovary of mutant females. *Gsdf* is known to be expressed in granulosa cells  
15 and to be involved in the maintenance and maturation of these cells (31)(32). *Inhibin*  
16 consists of a unique  $\alpha$  subunit and an activin  $\beta$  subunit. In the zebrafish ovary, members  
17 of the activin-inhibin-follistatin system exhibit dynamic changes in expression during  
18 folliculogenesis and the  $\alpha$  subunit (*inha*) is expressed during vitellogenesis, especially  
19 during final oocyte growth (*i.e.* prior to final oocyte maturation)(33).

20 Finally, QPCR analysis revealed a significant down-regulation of the transcription factor  
21 *foxl2b*, the only *foxl2* copy retained in medaka after teleost-specific genome duplication  
22 (34). In medaka, *foxl2b* is a female-specific gene expressed in somatic cells surrounding  
23 germ-cells in the germinal cradle. At later stages, *foxl2b* continue to be expressed in  
24 granulosa cells and in a minority of theca cells in pre-vitellogenic and vitellogenic

1 follicles, but expression ceased in post-vitellogenic follicles (35)(36). In mouse, *foxl2* is  
2 known as a key regulator of oogenesis and plays a critical role in ovarian differentiation  
3 (37)(38)(39).

#### 4 **Down-regulation of known genes expressed in the primary oocyte within the germinal** 5 **cradle (Fig 6B)**

6 We analyzed the expression of *sycp3*, *foxl3* (a *foxl2*-relative), *sox9b* and the medaka *vasa*-  
7 like gene (*olvas*). *Sycp3* and *foxl3* are both expressed in germ cells in the ovary and are  
8 both involved in the first meiotic division (4)(40). *Olvas* is known as a specific marker of  
9 early germ cells, which are nested in the cords of *sox9b*-expressing cells, referred to as  
10 the germinal cradle (41)(4). QPCR analysis revealed a down-regulation of *sycp3* and  
11 *foxl3* in the ovary of mutant females, although the diminution of *sycp3* expression is not  
12 significant. In contrast, the expression of *olvas* and *sox9b* was similar in wild-type and  
13 mutant ovaries. Together these observations suggest that germinal cradles of mutant  
14 ovaries are subjected to a reduced meiotic activity of primordial oogonia, while the  
15 mitotic activity of germline stem cells is likely to be maintained.

#### 16 **Down-regulation of other genes that belong to the WNT and KELCH families (Fig 6C)**

17 Among the most differentially expressed genes were several other genes coding for  
18 proteins of the WNT signaling pathway, including *wnt2bb* and *wnt4a*. In ovary of mutant  
19 females, QPCR revealed a clear and significant down-regulation of *wnt2bb* and *wnt4a*.  
20 *Wnt4a* is expressed in fish ovary, while the expression of *wnt2bb* remains  
21 uncharacterized to date (42). The microarray analysis also revealed a dramatic down-  
22 regulation of *klhl23*, a member of the KELCH Like Family. KELCH proteins were initially  
23 characterized due to their important role in oocyte-somatic cells communication during

1 drosophila oogenesis. Several members of this large family (over 30 members) are  
2 known to be expressed in the ovary of several vertebrates even though they remain  
3 poorly studied (43).

#### 4 **Identification of novel molecular players of oogenesis (Fig 6D)**

5 Finally, transcriptomic analysis revealed three other differentially expressed genes  
6 (*setd4*, *npr1b* and *srgap3*) that have never been previously described as molecular  
7 players of oogenesis. The *set domain-containing protein 4* (*setd4*) gene displayed a  
8 significantly reduced expression in ovary of mutant females. *Setd4* encodes for a  
9 recently characterized methyltransferase involved in breast cancer cell proliferation  
10 (44). While the role of *setd4* in the ovary remains unknown, a recent report  
11 demonstrated its role in the regulation of cell quiescence during the diapause of artemia  
12 embryos (45). The *natriuretic peptide receptor 1b* gene (*npr1b*) exhibited a marked over-  
13 expression. Although the role for *npr1b* in oogenesis has never been reported, the mouse  
14 *npr2* gene has already been detected in granulosa cells and shown to maintain meiotic  
15 arrest of oocytes in mouse ovary (46). The *slit-robo Rho GTPase activating protein 3*  
16 (*srgap3*) gene displayed a milder, yet significant, over-expression. Along with a well-  
17 established function in axon guidance, several studies suggested that the SLIT/ROBO  
18 pathway could also have important functions in the reproductive system (47). These  
19 results suggest that *setd4*, *npr1b* and *srgap3* are indeed novel molecular players of  
20 oogenesis. Given the greater number of down-regulated genes, in comparison to up-  
21 regulated genes, a non-annotated gene was selected for QPCR as a control and the  
22 profile observed on microarrays could be validated.

## 1 **DISCUSSION**

2 Most of our current understanding of the regulatory mechanisms of oogenesis in fish is  
3 due to several decades of research on hormones, secreted factors or intrinsic signaling  
4 pathways. However, miRNAs are well known for their role in many physiological  
5 processes through post-transcriptional gene regulations. Here, we showed that this  
6 fundamental class of molecules, endowed with pleiotropic functions, is also necessary  
7 for oogenesis in medaka ovary. In particular, we showed that *miR-202* plays a key role in  
8 follicular recruitment and growth, and ultimately in the female reproductive success, as  
9 shown by the severe phenotype of *miR-202* KO fishes.

### 10 **Mir-202-5p is the biologically active mature form in the ovary**

11 Our present results show that miR-202-5p is the predominant mature form processed  
12 from *miR-202* gene, while the miR-202-3p form is detected at much lower levels. This is  
13 consistent with existing data in which one miRNA form is biologically active, while the  
14 other is degraded. More specifically, our ISH experiments reveal that miR-202-5p is  
15 highly expressed in the somatic granulosa cells surrounding the oocyte. Consistently,  
16 recent transcriptomic studies in zebrafish reported either an increased expression of  
17 miR-202-5p during folliculogenesis or an increased expression in developing oocytes  
18 and unfertilized eggs (48)(49). Yet, it has also been claimed that *miR-202* could be  
19 expressed only in early medaka oocytes and absent at later stages, based on ISH  
20 experiments (16). Since our ISH did not reveal any expression of miR-202-5p above  
21 background levels in early oocytes, we presume that it is more likely accumulated  
22 during vitellogenesis in vitellogenic and/or post-vitellogenic oocytes, as suggested by  
23 the detectable expression in unfertilized eggs,

1 ***Mir-202* is required for both male and female reproductive success, but not**  
2 **for sex determination**

3 Here, we observed that the inactivation of *miR-202* in medaka does not lead to any  
4 modification of the sex ratio, since mutant siblings give rise to 50% of adult males and  
5 50% of adult females. This rules out the possibility of a key role of *miR-202* in sex-  
6 determination. It should however be stressed that the *miR-202* KO results in the sterility  
7 of both females and males. More particularly, when *miR-202* KO males were crossed  
8 with wild-type females, embryonic viability was dramatically reduced since most  
9 embryos were arrested during the first cleavage stages (st.4-5). To our knowledge, this  
10 phenotypic defect of male reproduction as never been reported before in fish, and it  
11 clearly indicates that *miR-202* is also required for spermatogenesis. This is in agreement  
12 with results obtained after *miR-202* KO in cultured spermatogonial stem cell in mouse,  
13 indicating a role in the control of the cellular proliferation/differentiation balance (27).  
14 Further studies are now required to unravel the precise role of *miR-202* in fish testis  
15 during spermatogenesis.

16 **Females lacking *miR-202* produce eggs that cannot be fertilized**

17 In this study, we paid special attention to the severe phenotype displayed by *miR-202*  
18 KO females. The overall reproductive success of mutant females was reduced to 0.83 or,  
19 even more, to 0 viable eggs per clutch, compared to 15.3 viable eggs per clutch for wild-  
20 type females. This phenotype is the consequence of both a reduced fecundity (*i.e.*  
21 reduced number of spawn eggs) and reduced egg viability. Mutant females indeed  
22 produce a large proportion of eggs that cannot be fertilized, subsequently resulting in no  
23 embryonic development. During folliculogenesis, the somatic cells that surround the



1 growing oocyte (granulosa and theca cells) contribute to the formation of the chorion,  
2 and the micropyle, which is primordial for the egg fertilization (50). It is thus likely that  
3 *miR-202*, which is expressed in granulosa cells throughout folliculogenesis, contributes  
4 to the formation of a functional chorion and micropyle. However, we cannot totally  
5 exclude an additional role of *miR-202* in oocytes during the growth and maturation  
6 steps, given the possible accumulation of *miR-202* inside the oocyte.

### 7 ***MiR-202* deficiency severely affects early folliculogenesis and female** 8 **fecundity**

9 The very low fecundity of *miR-202* KO females strongly indicates that *miR-202* plays an  
10 important role in the oogenesis processes in the ovary, which was further investigated.  
11 One of the most remarkable features observed in mutant ovaries was the abnormal  
12 increased number of pre-vitellogenic follicles. Along with this phenotype, we observed a  
13 reduced expression of *gsdf* (a member of the TGF $\beta$  family) and of the *foxl2* transcription  
14 factor. Both *gsdf* and *foxl2* are expressed in granulosa and are well known for their role  
15 as key regulators of early oogenesis/folliculogenesis (34)(51)(52). Downregulation of  
16 these factors thus confirms that *miR-202* likely controls the early development of  
17 granulosa cells (*i.e.* granulosa proliferation and/or differentiation) through the  
18 regulation of *gsdf* and *foxl2*, and ultimately leads to an impaired folliculogenesis. Such  
19 hypothesis is also supported by the down-regulation of downstream key genes,  
20 including steroidogenic genes (*star*, *cyp19a1a*, and *cyp17*) and the TGF- $\beta$  family member  
21 *inhibin*. The formers are involved in estrogen synthesis in ovarian follicles, while  
22 *inhibin* plays a critical role during follicular development in zebrafish (53). Further

1 analysis of the proliferation and differentiation states of granulosa cells are needed to  
2 fully understanding of the role of *miR-202* during folliculogenesis.  
3 Of particular interest is also the down-regulation of *gsdf* in *miR-202* mutant ovaries.  
4 Along with its well-established key role in the male-determination in medaka, the GSDF  
5 factor is also thought to be necessary for normal ovarian development (54)(31). Indeed,  
6 *gsdf* inactivation not only impairs male differentiation, but also leads to a severely  
7 reduced female fecundity up to a total infertility for the most severe cases. In such  
8 mutants, the number of pre-vitellogenic follicles is abnormally high (31). Except the  
9 male-determination phenotypic defect, many features of the *gsdf* mutant are very  
10 similar to that observed for *miR-202* KO females, including the pre-vitellogenic follicles  
11 accumulation. We hypothesize that *miR-202* promotes *gsdf* expression in the ovary and  
12 boost its action on follicular development. In any case, such hypothesis remains to be  
13 confirmed and molecular mechanisms underlying the interaction between miR-202-5p  
14 and *gsdf* remain to be identified.

### 15 ***Mir-202* knock-out impairs female meiosis**

16 The germinal cradle is composed somatic *sox9b*-expressing cells that surround mitotic  
17 and meiotic germ cells, as well as primordial oogonia barely engage into folliculogenesis  
18 (4). Our results show that *miR-202* is expressed in the germinal cradle, in a subset of  
19 *sox9b*-expressing cells surrounding primordial oogonia, which together likely  
20 correspond to primordial follicles. Interestingly, no modification of *sox9b* expression  
21 was observed in mutant ovaries, and previous studies in mouse have shown that *sox9*  
22 regulates the expression of *miR-202* in granulosa cells (55). It is thus possible that *miR-*  
23 *202* acts downstream of *sox9b* in medaka as well. However, molecular mechanisms that

1 regulate the expression of *miR-202* in follicles at later stages, in vitellogenic and post-  
2 vitellogenic follicles, remain to be determined since *sox9b* is not expressed at these  
3 stages.

4 We also observed, in juvenile ovaries, a down-regulation of the early meiotic oocyte  
5 markers *foxl3* and, to a lesser extent *sycp3*, even though no *miR-202* expression was  
6 detected in oocytes at this stage. Cellular interactions between germinal and somatic  
7 cells are thought to be important and to be mediated by several secreted factors  
8 (56)(57)(43). Consequently, any early defect of oocytes is likely to occur in the context  
9 of granulosa dysfunction (discussed above), including the onset of meiosis. One  
10 possibility is that *miR-202* depletion in the granulosa affects oocyte-somatic  
11 communications, as suggested by the down-regulation of KELCH proteins that have  
12 important functions in oocyte-somatic cell interactions in drosophila (43). This  
13 hypothesis is also supported by the dysregulation of the *npr1b* receptor and the  
14 intracellular effector *srgap3* of the SLIT/ROBO signaling pathway, which could both also  
15 mediate cellular communications in the ovary (46)(47).

## 16 ***Mir-202*, a major player rather than a fine modulator**

17 As discussed above, a drastic reduction of the reproductive success was observed for  
18 both male and female medaka lacking *miR-202*, including a reduced female fecundity  
19 and the production of poor quality eggs that cannot be fertilized. This phenotype was  
20 confirmed using two mutant lines bearing different INDELS obtained with the same  
21 guide RNA. It is generally considered that the purview of miRNAs is more likely the  
22 maintenance of regulatory networks, by fine-tuning gene expression, rather than the  
23 establishment of key regulatory networks for developmental decisions or core

1 physiological processes. This concept is supported by the fact miRNAs KO are commonly  
2 associated with “modest” phenotypic effects, which are strongly exacerbated only under  
3 particular condition, as for example manipulations, stresses or disease conditions (28).  
4 This is in contrast with the drastic reproductive phenotype observed here for *miR-202*  
5 KO fishes. It is however possible that *miR-202* modulates a large networks of targets,  
6 which would have a synergistic effect on key regulatory pathways for folliculogenesis,  
7 such as *gsdf* (as discussed above), and ultimately leads to subfertile or sterile females.  
8 Nevertheless, the phenotypes observed in *miR-202*<sup>-/-</sup> fish are among the most severe  
9 observed after miRNA KO, and it would be very informative in the future to determine  
10 whether the drastic *miR-202* KO phenotype is an exception in the ovary.

### 11 **A new look at oogenesis**

12 Surprisingly, the transcriptomic analysis performed in juvenile females, during the first  
13 reproductive cycle and before the occurrence of the first spawning, did not result in the  
14 identification of a large number of differentially expressed. It should however be  
15 stressed that among de differentially expressed genes were many genes that are crucial  
16 for steroidogenesis and reproduction, such as *star* and members of the *wnt* family (as  
17 discussed above). Despite these usual suspects, the transcriptome analysis also shed  
18 light on other genes such a genes of the *kelch* family that are less studied but believed to  
19 play an important role in oogenesis based on existing data in other animal species (58).  
20 Finally, the identification of genes that were previously not known to participate in  
21 oogenesis, such as *setd4*, *npr1b* and *srgap3*, could shed a new light on our understanding  
22 of this complex and coordinated biological process. This begs for further investigations  
23 that will greatly benefit from *miR-202*<sup>-/-</sup> fishes as a novel biological model.

## 1 **Conclusion**

2 In summary, our results show that *mir-202* is a key miRNA involved in the regulation of  
3 follicular recruitment and growth. This provides the first functional evidence that  
4 microRNAs are necessary for the female reproductive success and in particular the  
5 regulation of female fecundity. Furthermore, the present study shed new light on the  
6 regulatory mechanisms that control the early steps of follicular development, which  
7 remain poorly understood to date. A further systematic *in vivo* functional analysis of  
8 other ovarian-predominant miRNAs should greatly increase our knowledge on the  
9 overall role of miRNAs in oogenesis and female fecundity in fish.

## 10 **Materials and methods**

### 11 **Ethics statement**

12 All experimental procedures were conducted in strict accordance with the French and  
13 European regulations on animal welfare recommendations and were approved by the  
14 INRA LPGP Animal Care and Use Committee.

### 15 **Medaka breeding and tissues collection**

16 Adult medaka (*Oryzias latipes*) from the CAB strain and adults of the *Tg(sox9b::EGFP)*  
17 medaka line were raised at 26°C. Fishes were raised under a growing photoperiod  
18 regime until 3 months post-fertilization (12h light/ 12h dark) and under a reproduction  
19 photoperiod regime after 3 months post-fertilization (14h light/10h dark). For QPCR  
20 analysis, eleven different tissues/organs (brain, eyes, fins, gills, heart, intestine, kidney,  
21 liver, muscle, ovary and testis) were collected from wild-type and miR-202-/- fish.  
22 Embryos were collected at different stages (1-cell, 8-cell, stage 11/12, stage 17/18, stage

1 25/26, stage 29/30 and stage 39), according to the developmental table described by  
2 Iwamatsu *et al.* (59). For tissues/organs dissection, adult medaka fishes were  
3 euthanized by immersion in a lethal dose of tricaine à 30-50mg/L. All tissues/organs  
4 and embryos were immediately frozen in liquid nitrogen and subsequently stored at  
5 -80°C until RNA extraction. For histological analyses, ovaries were collected from wild-  
6 type females, fixed overnight in 4% paraformaldehyde (PFA) at 4°C and dehydrated in  
7 100% methanol and stored at -20°C, before histological analyses.

### 8 **Establishment of the *miR-202* mutant medaka line**

9 For the CRISPR/Cas9 knock-out analysis, the target genomic sequence was identified  
10 with the help of the ZiFiT online tool (<http://zifit.partners.org/ZiFiT/>) and using the  
11 medaka genome reference available on the Ensembl genome database (Ensembl gene:  
12 ENSORLG00000021212). A short sequence in the mature miR-202-3p was selected as  
13 followed: GG-(N)18-NN. Two inverse-complementary primers (Forward 5'-  
14 TAGGCATAAGGCATGGGAAAAT-3' and (Reverse 5'-AAACATTTTCCCATGCCTTATG-3')  
15 were annealed and cloned into the pDR274 vector (Addgene plasmid 42250) in the BsaI  
16 cloning site. The modified pDR274 vector was digested with DraI and the miR-202  
17 specific guide RNA (mir202-sgRNA) was transcribed using the T7 RNA polymerase  
18 (P207, Promega). For the Cas9-RNA *in vitro* synthesis, the pCS2-nCas9n vector (Addgene  
19 plasmid 47929) was linearized with NotI and capped RNA encoding the Cas9 was  
20 transcribed with the mMessage mMachine SP6 Kit (AM1340, Life Technologies)  
21 following manufacturer's instructions. Cas9 and sgRNA were purified using  
22 phenol/chloroform and precipitated by Ammonium acetate. Cas9-RNA (100 ng/μL) and  
23 *mir202*-sgRNA (10 ng/μL) were co-injected into one-cell stage embryos. Injected

1 embryos were raised to sexual maturity and 10 fishes were genotyped to identified  
2 founder fishes (F0). Fishes harboring the same INDEL mutation (-7+3) were selected  
3 and outcrossed with wild-type fishes to obtain F1 heterozygous. Such outcrosses were  
4 performed at each generation in order to maintain the line. Homozygous fishes were  
5 produced for histological and molecular phenotyping analyses. A second line harboring  
6 another INDEL mutation (-8) was used in order to confirm the reproductive phenotype,  
7 but this line was not used for further histological and molecular analyses.

## 8 **Genotyping**

9 Genomic DNA was extracted from a small piece of the caudal fin sampled from  
10 anesthetized adult fishes. Samples were lysed in 75mL of lysis buffer containing 1,25 M  
11 NaOH and 10 mM EDTA (pH 12) incubated at 90C for 1h and were neutralized with  
12 75mL of neutralization solution containing 2 M Tris-HCl (pH 5). To identify F0 founder  
13 fishes, genomic DNA around the expected mutation site was sequenced. For systematic  
14 genotyping of individuals of the established line, wild-type and mutant (INDEL -7+3)  
15 alleles were specifically detected by HID-PCR using specific reverse primers for each  
16 allele (S2 Table). The HID polymerase (Genaxxon bioscience, M3025.0250) was used  
17 with the following PCR conditions: 95°C for 2min; and 40 cycles of 95°C for 20 sec, 57°C  
18 for 15 sec and 72°C for 30 sec; and then 72°C for 7 min.

## 19 **Total RNA extraction**

20 Frozen tissues were lysed with Precellys Evolution Homogenizer (Ozyme, bertin  
21 technologies) in TRI Reagent (TR118, Euromedex) and total RNA was extracted using  
22 the “nucleospin RNA” kit (740955, Macherey Nagel).

## 1 **Quantitative PCR**

2 For expression analysis of mature miRNA forms, 20 ng of total RNA were reverse-  
3 transcribed (RT) using the TaqMan advanced miRNA cDNA Synthesis Kit (A28007,  
4 Applied Biosystems). Twenty fmol/ $\mu$ l of an external calibrator cel-miR-39-3p  
5 (478293\_miR, Life technologies) was added in the first step of the RT-Taqman PCR  
6 (polyA step) for 20ng of RNA. The cDNA was diluted (1:5) and universal primers (20x  
7 miR-Amp Primer Mix, 100029187, Applied Biosystems) were added in the last step of  
8 the RT reaction. The TaqMan QPCR was performed using 5  $\mu$ l of diluted cDNA, 1  $\mu$ l  
9 TaqMan Advanced miRNA Assay solution (CCU001S, Special Product Custom designed  
10 advanced miRNA assay, Life technologies) and 10  $\mu$ l Fast Advanced Master Mix  
11 (4444557, Applied Biosystems) in a total volume of 20  $\mu$ l. Specific modified probes  
12 complementary to *miR-202-5p* and *-3p* were designed as followed: mir-202-3p 5'<sub>FAM</sub>-  
13 AGAGGCATAAGGCATGGGAAAA-3'<sub>Quencher</sub> and mir-202-5p 5'<sub>FAM</sub>-  
14 TTCCTATGCATATACTTCTTTG-3'<sub>Quencher</sub> (Life technologies). QPCR was performed using  
15 the Step One Plus system (Applied Biosystems, USA) with the following conditions: 95°C  
16 for 20 sec; and 40 cycles of 95°C for 1 sec and 60°C for 20 sec. The relative expression of  
17 miRNA within a sample set was calculated from standard curve using Applied Biosystem  
18 StepOne V.2.0 software. All QPCR were performed in duplicates. MiR-26a (hsa-miR-26a-  
19 5p, A25576, ThermoFisher Scientific) or cel-miR-39-3p was used for normalization.

20 For mRNA and pri-miR-202 expression analysis, 2 $\mu$ g of total RNA was reverse-  
21 transcribed using the Maxima First Strand cDNA Synthesis Kit (K1671, ThermoFisher  
22 Scientific). The cDNA was diluted (1:20). The SyberGreen QPCR was performed using 4  
23  $\mu$ l of diluted cDNA, 5  $\mu$ l of GoTaq QPCR Master Mix 2x (A600A, Promega) and 100 nM of  
24 each primer (S3 Table), in a total volume of 10  $\mu$ l. The QPCR was performed using the



1 Step One Plus system (Applied Biosystems, Foster City, USA) with the following  
2 conditions: 95°C for 2 min; and 40 cycles of 95°C for 15 sec and 60°C for 1 min. Standard  
3 curves were generated using five serial cDNA dilutions (from 1:2 to 1:32) of a pool of all  
4 samples. The relative abundance of target cDNA was calculated from standard curve  
5 using Applied Biosystem StepOne V.2.0 software. All QPCR were performed in triplicates  
6 and the *rpl7* gene was used for normalization.

## 7 **Microarray analysis**

8 Gene expression profiling was conducted using an Agilent 8x60K microarray as  
9 previously described (60). Samples were randomly distributed on the microarray for  
10 hybridization. The data were processed using the GeneSpring software (Agilent v.14.5)  
11 using gMedianSignal values. The gene expression data was scale normalized and log(2)  
12 transformed before the statistical analysis. Corresponding data were deposited in Gene  
13 Expression Omnibus (GEO) (<https://www.ncbi.nlm.nih.gov/geo/>) database under the  
14 reference GSE111388. The differences between the groups were analyzed with unpaired  
15 t-test after application of minimum two-fold change filter with the significance level of 5  
16 % ( $p < 0.05$ ) after Benjamini-Hochberg correction.

## 17 **Fluorescent *in situ* hybridization and immunostaining**

18 For fluorescent *in situ* hybridization (FISH), fixed ovaries were embedded in paraffin  
19 and sections (9  $\mu$ m thickness) were performed with a microtome (HM355, microm). An  
20 anti-sense Locked Nucleic Acid (LNA) oligonucleotide was designed and produced by  
21 Exiqon A/S to detect the mature miR-202-3p form. Since medaka and human miR-202-  
22 5p sequences are identical, we used the hsa-miR-202-5p miRCURY LNA™ miRNA  
23 detection probe to detect the mature medaka miR-202-5p form. A LNA™ Scramble-miR

1 probe (5'-GTGTAACACGTCTATACGCCCA-3') was used as a negative control. All LNA<sup>TM</sup>  
2 probes were double-DIG labeled at both 5' and 3' ends. FISH was performed using the  
3 microRNA ISH Buffer Set (FFPE) Hybridization Buffer (ref. 90000, Exiqon), following the  
4 manufacturer's instructions with some modifications. Permeabilisation was performed  
5 for 7 min at room temperature using of Proteinase-K (10 mg/ml, P2308 Sigma). LNA  
6 probes were used at 20 nM at 53°C (30°C below the RNA T<sub>m</sub> °C) for 2 hours. Samples  
7 were then incubated overnight at 4°C with a rabbit anti-DIG HRP-conjugate antibody  
8 (1:500, Roche). For the GFP detection, a chicken anti-GFP (1/500, ref. ab13970, Abcam)  
9 was added at this step. The anti-GFP was first detected with a goat anti-chicken  
10 AlexaFluor488-conjugate antibody (1/500, ref. A11039, Life Technologies) for 1 hour at  
11 room temperature. Then, the anti-DIG-HRP antibody was detected with the TSA-Cy5  
12 substrate (1:50, TSA<sup>TM</sup> PLUS Cy5 kit, NEL 745001KT, Perkin Elmer) for 15 min at room  
13 temperature. All pictures were taken under SP8 confocal.

#### 14 **Nuclear staining and image analysis**

15 Fixed ovaries were embedded in paraffin and median sections (7 µm thickness) were  
16 performed with a microtome (HM355, microm). Nuclei were stained with DAPI (0,1  
17 µg/ml) at room temperature for 15 minutes in the dark. Median sections were washed  
18 1h in PBS at room temperature. Images of whole sections were acquired with a  
19 nanozoomer (HAMAMATSU). For quantitative image analyses, individual oocyte's area  
20 was measured using an image analysis software (Visilog 7.2 for Windows). Based on  
21 DAPI staining intensity, the nucleus were segmented then the inner part surround by  
22 the nucleus and corresponding to oocytes were individually measured. Pictures were  
23 taken under a Nikon AZ100 microscope and DS-Ri1 digital camera.

1

## 2 **ACKNOWLEDGMENTS**

3 We thank the INRA-LPGP fish facility staff, and especially Cecile Duret, for fish rearing  
4 and husbandry. We also thank the University of Rennes 1 H2P2 facility for the use of the  
5 slide scanning nanozoomer.

## 6 **Founding**

7 This work was funded by the TEFOR project (Agence National de la Recherche, ANR-II-  
8 INBS-0014, [http://www.agence-nationale-recherche.fr/investissements-d-  
9 avenir/projets-finances/](http://www.agence-nationale-recherche.fr/investissements-d-avenir/projets-finances/)). VT received the funding. This work has also been supported  
10 by the ERA-Net COFASP (COFA) AquaCrispr project (Agence National de la Recherche,  
11 ANR-16-COFA-0004, [http://www.agence-nationale-recherche.fr/suivi-bilan/editions-  
12 2013-et-anterieures/environnement-et-ressources-biologiques/era-net-cofasp-  
13 cooperation-in-fisheries-aquaculture-and-seafood-processing/](http://www.agence-nationale-recherche.fr/suivi-bilan/editions-2013-et-anterieures/environnement-et-ressources-biologiques/era-net-cofasp-cooperation-in-fisheries-aquaculture-and-seafood-processing/)). JB received the funding.  
14 The funders had no role in study design, data collection and analysis, decision to  
15 publish, or preparation of the manuscript.

## 16 **Author Contributions**

17 SG performed histological and molecular analyses, participated in mutant fish  
18 phenotyping, data analysis and manuscript writing. JBu participated in histological  
19 analyses. AB participated in generating the mutant line and in tissue collection and RNA  
20 extraction. LH participated in reproductive phenotype analysis. ALC performed the  
21 microarray analysis. JM performed bioinformatics analyses. VT and JBo conceived the

1 study, participated in data analyses and wrote the manuscript. VT supervised and  
2 coordinated the study. All authors read and approved the final manuscript.

### 3 **Additional information**

#### 4 **Supplementary information accompanies this paper**

#### 5 **Competing financial interests**

6 The authors declare that they have no competing interests.

#### 7 **Availability of data and material**

8 The microarray expression data are available from the gene expression omnibus (GEO)  
9 database (accession # GSE111388, <http://www.ncbi.nlm.nih.gov/geo/>).

10

## 1 References

- 2 1. Iwamatsu T, Ohta T, Oshima E, Sakai N. Oogenesis in the Medaka *Oryzias latipes* :  
3 Stages of Oocyte Development : *Developmental Biology*. *Zoolog Sci*. 1988;5:353–73.
- 4 2. Nishimura T, Tanaka M. Gonadal Development in Fish. *Sex Dev*. 2014 Sep 8;8(5):252–  
5 61.
- 6 3. Lubzens E, Young G, Bobe J, Cerdà J. Oogenesis in teleosts: how eggs are formed. *Gen*  
7 *Comp Endocrinol*. 2010 Feb 1;165(3):367–89.
- 8 4. Nakamura S, Kobayashi K, Nishimura T, Higashijima S, Tanaka M. Identification of  
9 Germline Stem Cells in the Ovary of the Teleost Medaka. *Science*. 2010 Jun  
10 18;328(5985):1561–3.
- 11 5. Donadeu FX, Schauer SN, Sontakke SD. Involvement of miRNAs in ovarian follicular  
12 and luteal development. *J Endocrinol*. 2012 Jan 12;215(3):323–34.
- 13 6. Li X, Wang H, Sheng Y, Wang Z. MicroRNA-224 delays oocyte maturation through  
14 targeting Ptx3 in cumulus cells. *Mech Dev*. 2017;143:20–5.
- 15 7. Yao G, Liang M, Liang N, Yin M, Lü M, Lian J, et al. MicroRNA-224 is involved in the  
16 regulation of mouse cumulus expansion by targeting Ptx3. *Mol Cell Endocrinol*. 2014  
17 Jan 25;382(1):244–53.
- 18 8. Bizuayehu TT, Babiak I. MicroRNA in Teleost Fish. *Genome Biol Evol*. 2014 Jul  
19 22;6(8):1911–37.
- 20 9. Juanchich A, Le Cam A, Montfort J, Guiguen Y, Bobe J. Identification of Differentially  
21 Expressed miRNAs and Their Potential Targets During Fish Ovarian Development. *Biol*  
22 *Reprod* [Internet]. 2013 May 1 [cited 2017 Jun 11];88(5). Available from:  
23 [https://academic.oup.com/biolreprod/article/88/5/128, 1-11/2514159/Identification-of-](https://academic.oup.com/biolreprod/article/88/5/128, 1-11/2514159/Identification-of-Differentially-Expressed-miRNAs)  
24 [Differentially-Expressed-miRNAs](https://academic.oup.com/biolreprod/article/88/5/128, 1-11/2514159/Identification-of-Differentially-Expressed-miRNAs)
- 25 10. Wong QW-L, Sun M-A, Lau S-W, Parsania C, Zhou S, Zhong S, et al. Identification and  
26 characterization of a specific 13-miRNA expression signature during follicle activation  
27 in the zebrafish ovary. *Biol Reprod*. 2018 Jan 1;98(1):42–53.
- 28 11. Liu J, Luo M, Sheng Y, Hong Q, Cheng H, Zhou R. Dynamic evolution and biogenesis of  
29 small RNAs during sex reversal. *Sci Rep* [Internet]. 2015 May 6;5. Available from:  
30 <https://www.ncbi.nlm.nih.gov/pmc/articles/PMC4421800/>
- 31 12. Bizuayehu TT, Lanes CF, Furmanek T, Karlsen BO, Fernandes JM, Johansen SD, et al.  
32 Differential expression patterns of conserved miRNAs and isomiRs during Atlantic  
33 halibut development. *BMC Genomics*. 2012 Jan 10;13:11.
- 34 13. Jing J, Wu J, Liu W, Xiong S, Ma W, Zhang J, et al. Sex-Biased miRNAs in Gonad and  
35 Their Potential Roles for Testis Development in Yellow Catfish. *PLoS ONE* [Internet].

- 1        2014    Sep    17    [cited   2018    Mar    9];9(9).    Available    from:  
2        <https://www.ncbi.nlm.nih.gov/pmc/articles/PMC4168133/>
- 3    14. Xiao J, Zhong H, Zhou Y, Yu F, Gao Y, Luo Y, et al. Identification and Characterization  
4        of MicroRNAs in Ovary and Testis of Nile Tilapia (*Oreochromis niloticus*) by Using  
5        Solexa Sequencing Technology. PLoS ONE [Internet]. 2014 Jan 23 [cited 2018 Mar  
6        9];9(1). Available from: <https://www.ncbi.nlm.nih.gov/pmc/articles/PMC3900680/>
- 7    15. Tao W, Sun L, Shi H, Cheng Y, Jiang D, Fu B, et al. Integrated analysis of miRNA and  
8        mRNA expression profiles in tilapia gonads at an early stage of sex differentiation. BMC  
9        Genomics [Internet]. 2016 May 4 [cited 2018 Mar 9];17. Available from:  
10       <https://www.ncbi.nlm.nih.gov/pmc/articles/PMC4855716/>
- 11   16. Qiu W, Zhu Y, Wu Y, Yuan C, Chen K, Li M. Identification and expression analysis of  
12       microRNAs in medaka gonads. *Gene*. 2018 Mar 10;646:210–6.
- 13   17. Lai KP, Li J-W, Tse AC-K, Chan T-F, Wu RS-S. Hypoxia alters steroidogenesis in  
14       female marine medaka through miRNAs regulation. *Aquat Toxicol Amst Neth*. 2016  
15       Mar;172:1–8.
- 16   18. Armisen J, Gilchrist MJ, Wilczynska A, Standart N, Miska EA. Abundant and  
17       dynamically expressed miRNAs, piRNAs, and other small RNAs in the vertebrate  
18       *Xenopus tropicalis*. *Genome Res*. 2009 Oct;19(10):1766–75.
- 19   19. Bizuayehu TT, Babiak J, Norberg B, Fernandes JMO, Johansen SD, Babiak I. Sex-Biased  
20       miRNA Expression in Atlantic Halibut (*Hippoglossus hippoglossus*) Brain and Gonads.  
21       *Sex Dev*. 2012;6(5):257–66.
- 22   20. Landgraf P, Rusu M, Sheridan R, Sewer A, Iovino N, Aravin A, et al. A Mammalian  
23       microRNA Expression Atlas Based on Small RNA Library Sequencing. *Cell*. 2007 Jun  
24       29;129(7):1401–14.
- 25   21. Ro S, Song R, Park C, Zheng H, Sanders KM, Yan W. Cloning and expression profiling  
26       of small RNAs expressed in the mouse ovary. *RNA*. 2007 Dec;13(12):2366–80.
- 27   22. Bannister SC, Smith CA, Roeszler KN, Doran TJ, Sinclair AH, Tizard MLV.  
28       Manipulation of Estrogen Synthesis Alters MIR202\* Expression in Embryonic Chicken  
29       Gonads. *Biol Reprod*. 2011 Jan 7;85(1):22–30.
- 30   23. Xu L, Guo Q, Chang G, Qiu L, Liu X, Bi Y, et al. Discovery of microRNAs during early  
31       spermatogenesis in chicken. *PloS One*. 2017;12(5):e0177098.
- 32   24. Juanchich A, Bardou P, Rué O, Gabillard J-C, Gaspin C, Bobe J, et al. Characterization of  
33       an extensive rainbow trout miRNA transcriptome by next generation sequencing. BMC  
34       Genomics [Internet]. 2016 Mar 1;17. Available from:  
35       <http://www.ncbi.nlm.nih.gov/pmc/articles/PMC4774146/>
- 36   25. Bouchareb A, Le Cam A, Montfort J, Gay S, Nguyen T, Bobe J, et al. Genome-wide  
37       identification of novel ovarian-predominant miRNAs: new insights from the medaka

- 1 (Oryzias latipes). Sci Rep [Internet]. 2017 Jan 10 [cited 2017 Jan 27];7. Available from:  
2 <http://www.ncbi.nlm.nih.gov/pmc/articles/PMC5223123/>
- 3 26. Zheng P, Dean J. Oocyte-Specific Genes Affect Folliculogenesis, Fertilization, and Early  
4 Development. Semin Reprod Med. 2007 Jul;25(04):243–51.
- 5 27. Chen J, Cai T, Zheng C, Lin X, Wang G, Liao S, et al. MicroRNA-202 maintains  
6 spermatogonial stem cells by inhibiting cell cycle regulators and RNA binding proteins.  
7 Nucleic Acids Res. 2016 Dec 19;gkw1287.
- 8 28. Lai EC. Two decades of miRNA biology: lessons and challenges. RNA. 2015  
9 Apr;21(4):675–7.
- 10 29. Lin D, Sugawara T, Strauss JF, Clark BJ, Stocco DM, Saenger P, et al. Role of  
11 steroidogenic acute regulatory protein in adrenal and gonadal steroidogenesis. Science.  
12 1995 Mar 24;267(5205):1828–31.
- 13 30. Stocco DM. StAR protein and the regulation of steroid hormone biosynthesis. Annu Rev  
14 Physiol. 2001;63:193–213.
- 15 31. Guan G, Sun K, Zhang X, Zhao X, Li M, Yan Y, et al. Developmental tracing of oocyte  
16 development in gonadal soma-derived factor deficiency medaka (*Oryzias latipes*) using a  
17 transgenic approach. Mech Dev. 2017;143:53–61.
- 18 32. Yan Y-L, Desvignes T, Bremiller R, Wilson C, Dillon D, High S, et al. Gonadal soma  
19 controls ovarian follicle proliferation through Gsdf in zebrafish. Dev Dyn Off Publ Am  
20 Assoc Anat. 2017 Nov;246(11):925–45.
- 21 33. Poon S-K, So W-K, Yu X, Liu L, Ge W. Characterization of inhibin  $\alpha$  subunit (inha) in  
22 the zebrafish: evidence for a potential feedback loop between the pituitary and ovary.  
23 Reproduction. 2009 Jan 10;138(4):709–19.
- 24 34. Bertho S, Pasquier J, Pan Q, Le Trionnaire G, Bobe J, Postlethwait JH, et al. Foxl2 and Its  
25 Relatives Are Evolutionary Conserved Players in Gonadal Sex Differentiation. Sex Dev  
26 Genet Mol Biol Evol Endocrinol Embryol Pathol Sex Determ Differ. 2016;10(3):111–  
27 29.
- 28 35. Herpin A, Adolphi MC, Nicol B, Hinzmann M, Schmidt C, Klughammer J, et al. Divergent  
29 Expression Regulation of Gonad Development Genes in Medaka Shows Incomplete  
30 Conservation of the Downstream Regulatory Network of Vertebrate Sex Determination.  
31 Mol Biol Evol. 2013 Oct;30(10):2328–46.
- 32 36. Nakamoto M, Matsuda M, Wang D-S, Nagahama Y, Shibata N. Molecular cloning and  
33 analysis of gonadal expression of Foxl2 in the medaka, *Oryzias latipes*. Biochem  
34 Biophys Res Commun. 2006 May 26;344(1):353–61.
- 35 37. Uhlenhaut NH, Jakob S, Anlag K, Eisenberger T, Sekido R, Kress J, et al. Somatic sex  
36 reprogramming of adult ovaries to testes by FOXL2 ablation. Cell. 2009 Dec  
37 11;139(6):1130–42.

- 1 38. Ottolenghi C, Omari S, Garcia-Ortiz JE, Uda M, Crisponi L, Forabosco A, et al. Foxl2 is  
2 required for commitment to ovary differentiation. *Hum Mol Genet.* 2005 Jul  
3 15;14(14):2053–62.
- 4 39. Schmidt D, Ovitt CE, Anlag K, Fehsenfeld S, Gredsted L, Treier A-C, et al. The murine  
5 winged-helix transcription factor Foxl2 is required for granulosa cell differentiation and  
6 ovary maintenance. *Development.* 2004 Feb 15;131(4):933–42.
- 7 40. Nishimura T, Tanaka M. The Mechanism of Germline Sex Determination in Vertebrates.  
8 *Biol Reprod [Internet].* 2016 Jul 1 [cited 2017 May 17];95(1). Available from:  
9 [https://academic.oup.com/biolreprod/article-abstract/95/1/30,](https://academic.oup.com/biolreprod/article-abstract/95/1/30,1-6/2883593/The-Mechanism-of-Germline-Sex-Determination-in)  
10 [1-6/2883593/The-](https://academic.oup.com/biolreprod/article-abstract/95/1/30,1-6/2883593/The-Mechanism-of-Germline-Sex-Determination-in)  
[Mechanism-of-Germline-Sex-Determination-in](https://academic.oup.com/biolreprod/article-abstract/95/1/30,1-6/2883593/The-Mechanism-of-Germline-Sex-Determination-in)
- 11 41. Kurokawa H, Aoki Y, Nakamura S, Ebe Y, Kobayashi D, Tanaka M. Time-lapse analysis  
12 reveals different modes of primordial germ cell migration in the medaka *Oryzias latipes*.  
13 *Dev Growth Differ.* 2006 Apr;48(3):209–21.
- 14 42. Hu Q, Zhu Y, Liu Y, Wang N, Chen S. Cloning and characterization of wnt4a gene and  
15 evidence for positive selection in half-smooth tongue sole (*Cynoglossus semilaevis*). *Sci*  
16 *Rep [Internet].* 2014 Nov 24 [cited 2018 Mar 7];4. Available from:  
17 <https://www.ncbi.nlm.nih.gov/pmc/articles/PMC4241513/>
- 18 43. Charlier C, Montfort J, Chabrol O, Brisard D, Nguyen T, Le Cam A, et al. Oocyte-  
19 somatic cells interactions, lessons from evolution. *BMC Genomics.* 2012 Oct 19;13:560.
- 20 44. Faria JAQA, Corrêa NCR, de Andrade C, de Angelis Campos AC, dos Santos Samuel de  
21 Almeida R, Rodrigues TS, et al. SET domain-containing Protein 4 (SETD4) is a Newly  
22 Identified Cytosolic and Nuclear Lysine Methyltransferase involved in Breast Cancer  
23 Cell Proliferation. *J Cancer Sci Ther.* 2013 Jan 21;5(2):58–65.
- 24 45. Dai L, Ye S, Li H-W, Chen D-F, Wang H-L, Jia S-N, et al. SETD4 Regulates Cell  
25 Quiescence and Catalyzes the Trimethylation of H4K20 during Diapause Formation in  
26 *Artemia*. *Mol Cell Biol [Internet].* 2017 Mar 17 [cited 2018 Mar 7];37(7). Available  
27 from: <https://www.ncbi.nlm.nih.gov/pmc/articles/PMC5359430/>
- 28 46. Zhang M, Su Y-Q, Sugiura K, Xia G, Eppig JJ. Granulosa Cell Ligand NPPC and Its  
29 Receptor NPR2 Maintain Meiotic Arrest in Mouse Oocytes. *Science.* 2010 Oct  
30 15;330(6002):366–9.
- 31 47. Dickinson RE, Duncan WC. The SLIT/ROBO pathway: a regulator of cell function with  
32 implications for the reproductive system. *Reprod Camb Engl.* 2010 Apr;139(4):697–704.
- 33 48. Wong QW-L, Sun M-A, Lau S-W, Parsania C, Zhou S, Zhong S, et al. Identification and  
34 characterization of a specific 13-miRNA expression signature during follicle activation  
35 in the zebrafish ovary. *Biol Reprod.* 2017 Dec 6;
- 36 49. Zhang J, Liu W, Jin Y, Jia P, Jia K, Yi M. MiR-202-5p is a novel germ plasm-specific  
37 microRNA in zebrafish. *Sci Rep [Internet].* 2017 Aug 1 [cited 2018 Mar 7];7. Available  
38 from: <https://www.ncbi.nlm.nih.gov/pmc/articles/PMC5539161/>



- 1 50. Marlow FL, Mullins MC. Bucky ball functions in Balbiani body assembly and animal-  
2 vegetal polarity in the oocyte and follicle cell layer in zebrafish. *Dev Biol*. 2008 Sep  
3 1;321(1):40–50.
- 4 51. Imai T, Saino K, Matsuda M. Mutation of Gonadal soma-derived factor induces medaka  
5 XY gonads to undergo ovarian development. *Biochem Biophys Res Commun*. 2015 Nov  
6 6;467(1):109–14.
- 7 52. Guan G, Sun K, Zhang X, Zha X, Li M, Yan Y, et al. Developmental tracing of oocyte  
8 development in gonadal soma-derived factor deficiency medaka (*Oryzias latipes*) using a  
9 transgenic approach. *Mech Dev* [Internet]. [cited 2017 Jan 20]; Available from:  
10 [//www.sciencedirect.com/science/article/pii/S0925477316301320](http://www.sciencedirect.com/science/article/pii/S0925477316301320)
- 11 53. Li CW, Ge W. Regulation of the activin-inhibin-follistatin system by bone morphogenetic  
12 proteins in the zebrafish ovary. *Biol Reprod*. 2013 Sep;89(3):55.
- 13 54. Zhang X, Guan G, Li M, Zhu F, Liu Q, Naruse K, et al. Autosomal *gsdf* acts as a male sex  
14 initiator in the fish medaka. *Sci Rep* [Internet]. 2016 Jan 27 [cited 2018 Mar 8];6.  
15 Available from: <https://www.ncbi.nlm.nih.gov/pmc/articles/PMC4728440/>
- 16 55. Wainwright EN, Jorgensen JS, Kim Y, Truong V, Bagheri-Fam S, Davidson T, et al.  
17 SOX9 Regulates MicroRNA miR-202-5p/3p Expression During Mouse Testis  
18 Differentiation. *Biol Reprod* [Internet]. 2013 Aug 1 [cited 2018 Mar 7];89(2). Available  
19 from: <https://academic.oup.com/biolreprod/article/89/2/34, 1-12/2514043>
- 20 56. Kidder GM, Vanderhyden BC. Bidirectional communication between oocytes and follicle  
21 cells: ensuring oocyte developmental competence. *Can J Physiol Pharmacol*. 2010  
22 Apr;88(4):399–413.
- 23 57. Zuccotti M, Merico V, Cecconi S, Redi CA, Garagna S. What does it take to make a  
24 developmentally competent mammalian egg? *Hum Reprod Update*. 2011 Jul  
25 1;17(4):525–40.
- 26 58. Robinson DN, Cant K, Cooley L. Morphogenesis of *Drosophila* ovarian ring canals. *Dev*  
27 *Camb Engl*. 1994 Jul;120(7):2015–25.
- 28 59. Iwamatsu T. Stages of normal development in the medaka *Oryzias latipes*. *Mech Dev*.  
29 2004 Jul;121(7–8):605–18.
- 30 60. Żarski D, Nguyen T, Le Cam A, Montfort J, Dutto G, Vidal MO, et al. Transcriptomic  
31 Profiling of Egg Quality in Sea Bass (*Dicentrarchus labrax*) Sheds Light on Genes  
32 Involved in Ubiquitination and Translation. *Mar Biotechnol N Y N*. 2017;19(1):102–15.

33

34

## 1 **Supporting information**

2 **S1 Fig.** FISH on ovarian section performed with a scramble control probe

3 **S1 Table.** Differentially expressed genes obtained through a microarray analysis

4 **S2 Table.** Primers used for HIDI-PCR

5 **S3 Table.** Primers used for QPCR

## 6 **Figure captions**

7 **Figure 1: Expression profile of miR-202-5p in adult tissues and during embryonic**  
8 **development. (A)** Sequence and secondary structure of the pre-miR-202. miR-202-5p  
9 is in red and miR-202-3p in blue. **(B)** Tissue distribution of miR-202-5p in eleven adult  
10 tissues obtained by TaqMan QPCR (Box plots, n=8, the ends of the boxes define the 25th  
11 and 75th percentiles; a line indicates the median and bars define the 5th and 95th  
12 percentiles). Cel-miR-39-3p was used as an external calibrator for normalization. **(C)**  
13 Expression profile of miR-202-5p during embryonic development. Pools of embryos at  
14 the same stage were used for TaqMan QPCR. *ns*, no significant difference (Student t-  
15 test). #expression levels not significantly different from the background signal.

16

17 **Figure 2: Expression of miR-202-5p and miR-202-3p in the ovary.** Fluorescent *in*  
18 *situ* hybridizations (FISH) were performed on sections of ovaries from juvenile and  
19 adult medaka females. MiR-202-5p **(A, B)** and miR-202-3p **(C, D)** were detected with  
20 specific LNA miRNAs detection probes (in red). Ovaries of adult females were dissected  
21 from the transgenic medaka line *Tg(sox9b::EGFP)*. The somatic GFP+ cells of the  
22 germinal cradle, including early granulosa cells, were immunodetected (in green) **(B, D)**.  
23 Nuclei are stained with DAPI (in blue). **(A')** A magnified view of the juvenile ovarian

1 section. **(B', B'' and B''')** Magnified views of the adult ovarian section. Mir-202-5p is  
2 detected in granulosa cells of follicles at all stages in both juvenile and adult ovary  
3 (arrowhead), but not in the theca cells (arrow). **(B''')** MiR-202-5p co-localize with GFP in  
4 early granulosa cells surrounding pre-vitellogenic follicles. **(C, D)** Mir-202-3p is not  
5 detected in ovaries from juvenile and adult fishes. PreV, pre-vitellogenic follicle; V,  
6 vitellogenic follicle; PV, post-vitellogenic follicles. Scale bars: 500  $\mu\text{m}$  (A-D), 50  $\mu\text{m}$  (A',  
7 B', B'') and 20  $\mu\text{m}$  (B''').

8

9 **Figure 3: Analysis of the reproductive phenotype of *miR-202*<sup>-/-</sup> adult fish. (A)**

10 Genomic regions of wild-type and mutant fishes showing the INDEL mutations (-7+3)  
11 inserted in the miR-202-3p sequence using CRISPR/Cas9 genome engineering. **(B)**  
12 Expression levels of the pri-miR-202 and miR-202-5p forms in the ovaries of wild-type  
13 and homozygotes females (*miR-202*<sup>-/-</sup>) were measured by QPCR. **(C)** Spawning  
14 frequency of mutant and wild-type females were monitored during ten days. Subfertile  
15 females (irregular spawning) and sterile females (only one spawning) represent  
16 respectively 85% and 15% of all analyzed females. **(D)** Number of eggs per clutch  
17 spawned by wild-type or subfertile females when mated with wild-type or mutant  
18 males. **(E)** Embryonic viability of spawn eggs measured by the percentage of eggs that  
19 are fertilized and that develop correctly. **(F)** Representative pictures of eggs from the  
20 different crosses of wild-type and mutant males and females. Mean values ( $\pm$  SEM) are  
21 displayed on the graphs. \* indicates expression levels that are significantly different  
22 (Mann Whitney test,  $p < 0.05$ ). Different letters indicate a significant difference, as  
23 determined by a one-way ANOVA test (Tukey's post hoc test). #expression levels not  
24 significantly different from the background signal.

1 **Figure 4: Quantitative image analysis of *miR-202*<sup>-/-</sup> juvenile ovaries. (A)** Median  
2 sections of ovaries from juvenile wild-type and *miR-202*<sup>-/-</sup> fishes. All nuclei are stained  
3 with DAPI (in blue). Image sections were automatically segmented. **(B)** Section area,  
4 mean follicle diameter and follicle number automatically determined. **(C)** Size  
5 distribution of follicles on sections. The number of small follicles (50-100  $\mu\text{m}$ ) is  
6 significantly higher compared to wild-type, while the number of follicles in the larger  
7 diameter class (200-350  $\mu\text{m}$ ) tends to decrease. Box plots are displayed on graphs for  
8 wild-type (n=7) and *miR-202*<sup>-/-</sup> (n=8) juvenile females (in red and green, respectively).  
9 The ends of the boxes define the 25th and 75th percentiles; a line indicates the median  
10 and bars define the 5th and 95th percentiles. Individual values are shown for the graphs  
11 of panel B. Asterisks indicate significant differences (\*  $p < 0.05$  and \*\*  $p < 0.01$ , Mann  
12 Whitney test). Scale bar: 500  $\mu\text{m}$ .

13  
14 **Figure 5: Quantitative image analysis of *miR-202*<sup>-/-</sup> adult ovaries. (A)** Median  
15 sections of ovaries from wild-type, sterile and subfertile mutant females. All nuclei are  
16 stained with DAPI (in blue). Image sections were automatically segmented. **(B)** Section  
17 area, mean follicle diameter and follicle number automatically determined. **(C)** Size  
18 distribution of follicles on sections. In ovaries from sterile females, the number of large  
19 follicles (>400  $\mu\text{m}$ ) is significantly reduced, while small follicles (<100  $\mu\text{m}$ ) tend to  
20 accumulate. In the ovary from subfertile females, the number of medium follicles (100-  
21 400  $\mu\text{m}$ ) is significantly reduced, but small size follicles (<100  $\mu\text{m}$ ) do not accumulate.  
22 Box plots are displayed on graphs for wild-type (n=10), *miR-202*<sup>-/-</sup> subfertile (n=10)  
23 and *miR-202*<sup>-/-</sup> sterile (n=4) adult females (in red, green and blue, respectively). The  
24 ends of the boxes define the 25th and 75th percentiles; a line indicates the median and

1 bars define the 5th and 95th percentiles. Individual values are shown for graphs of panel  
2 B. Asterisks indicate significant differences (\*  $p < 0.05$  and \*\*  $p < 0.01$ , Mann Whitney  
3 test). Scale bar: 500  $\mu\text{m}$ .

4

5 **Figure 6: mRNA expression profiles of ovarian genes in *miR-202*  $-/-$  females.** Gene  
6 expression levels in wild-type and ovaries from juvenile females were obtained by  
7 QPCR. (A) Genes expressed in the somatic germ-cell supporting cells. (B) Genes  
8 expressed in primary oocytes within the germinal cradle. (C) Genes that belong to the  
9 WNT and KELCH families. (D) Dysregulated genes that have never been previously  
10 described as molecular players of oogenesis. Expression levels were measured in  
11 triplicates. Box plots are displayed on graphs for wild-type (n=6) and *miR-202*  $-/-$  (n=5)  
12 juvenile females. The ends of the boxes define the 25th and 75th percentiles; a line  
13 indicates the median and bars define the 5th and 95th percentiles. Individual values are  
14 shown. The *rpl7* gene was used for normalization. Asterisks indicate significant  
15 differences (\*  $p < 0.05$  and \*\*  $p < 0.01$ , Mann Whitney test).

A

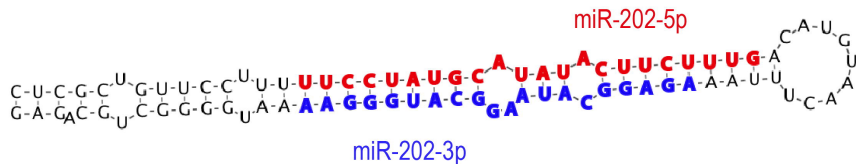

B

Expression of miR-202-5p  
in various adult tissues

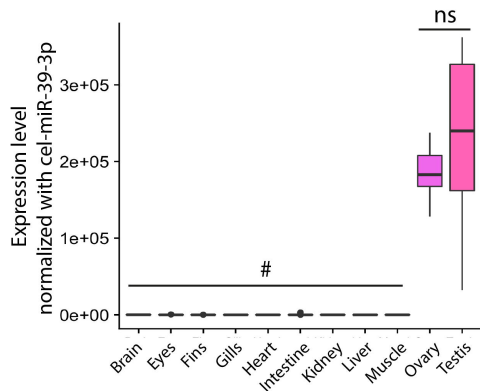

C

Expression of miR-202-5p  
during embryonic development

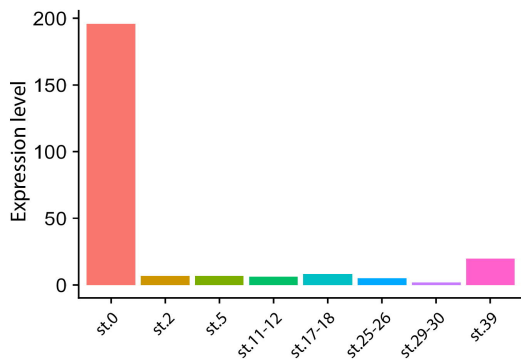

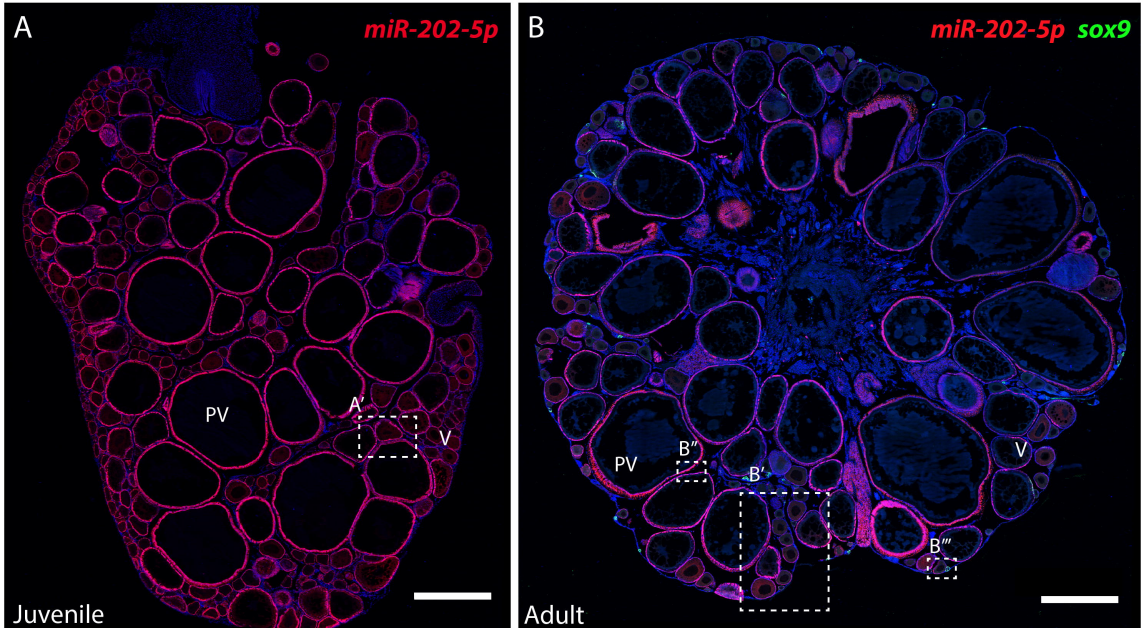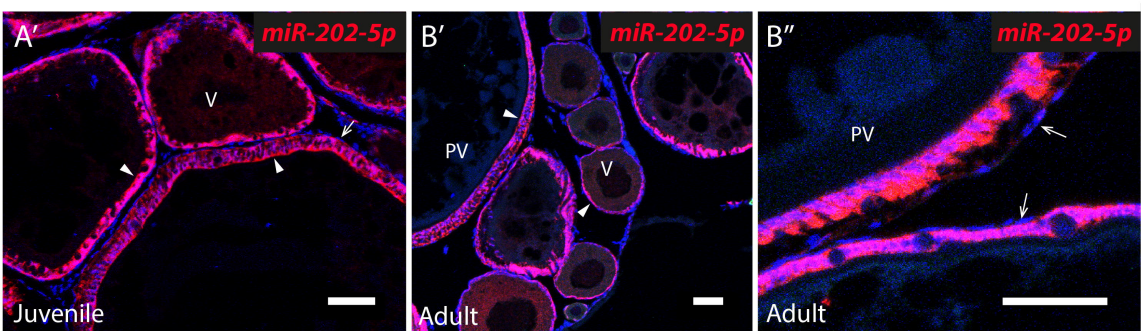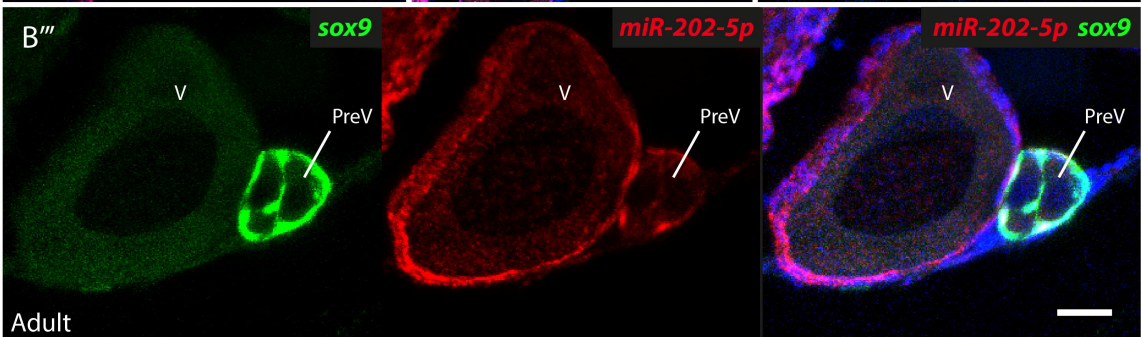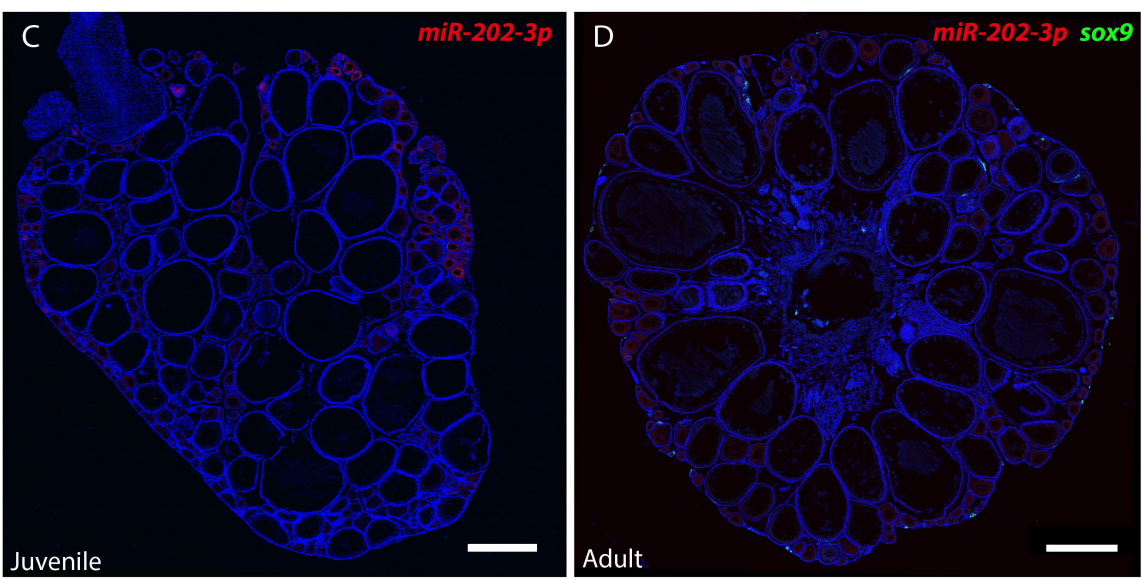

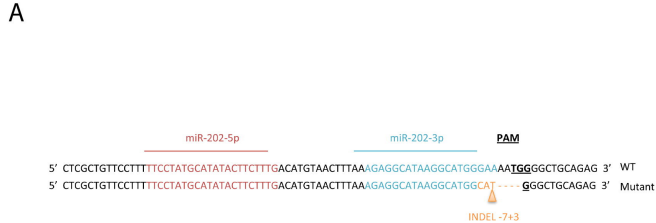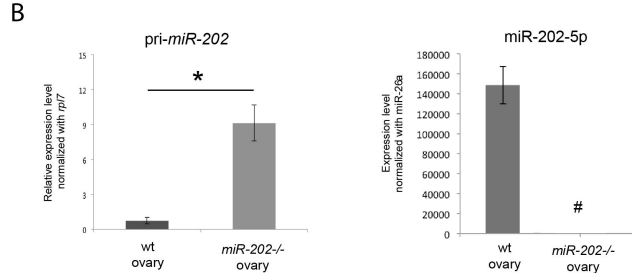

**C**

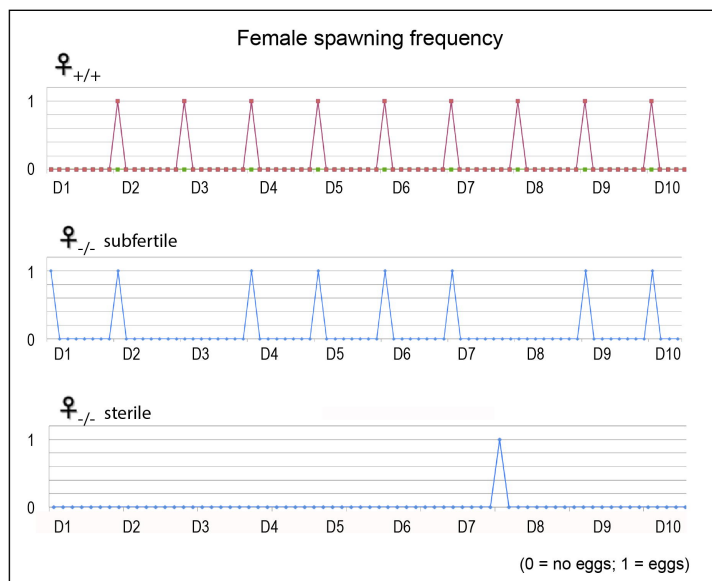

**D**

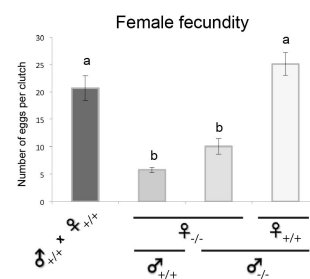

**E**

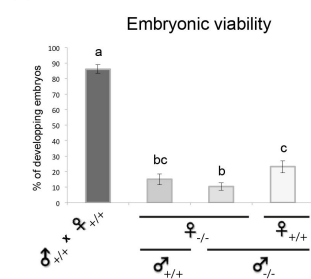

**F**

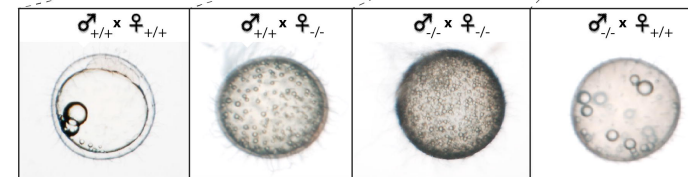



A

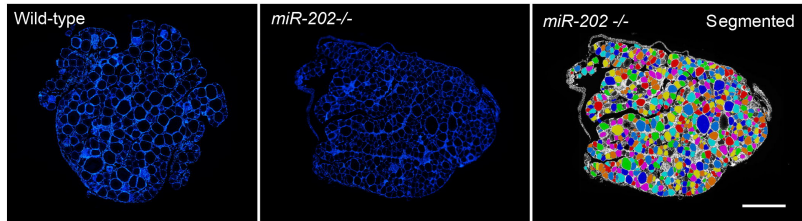

B

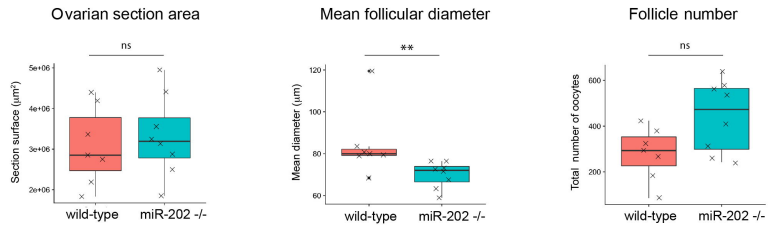

C

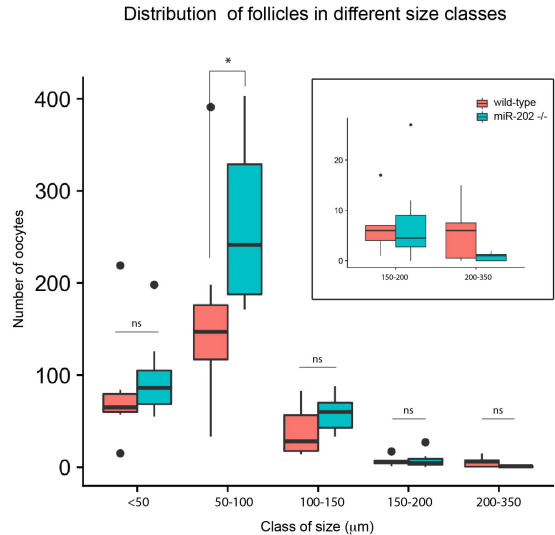

A

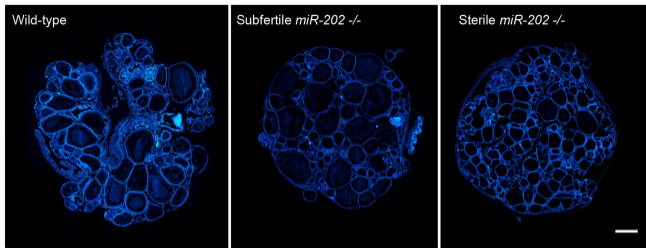

B

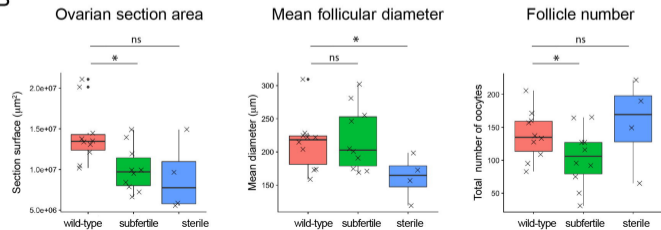

C

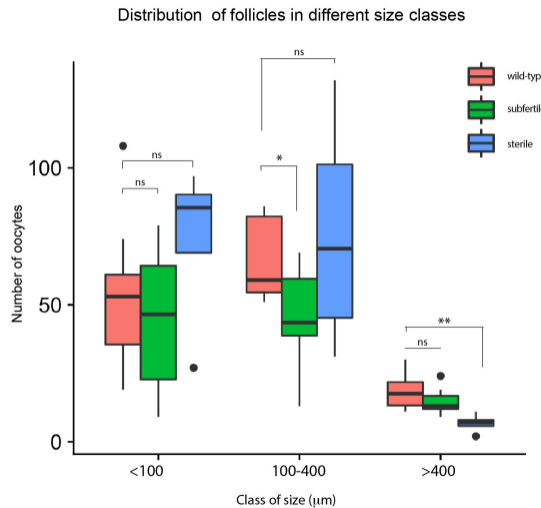

A

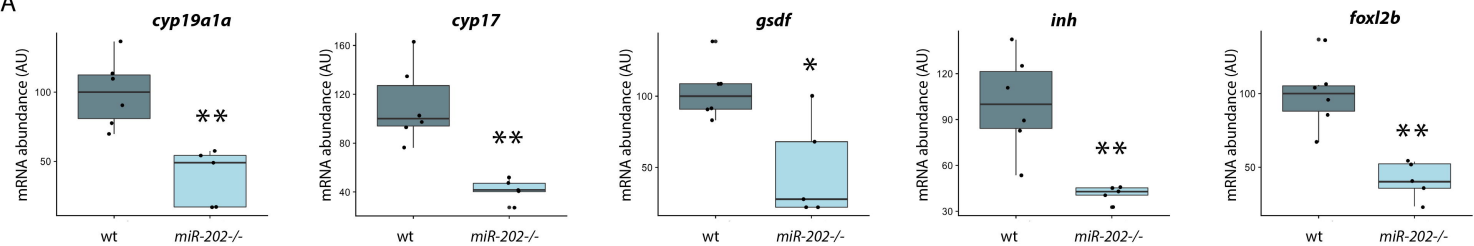

B

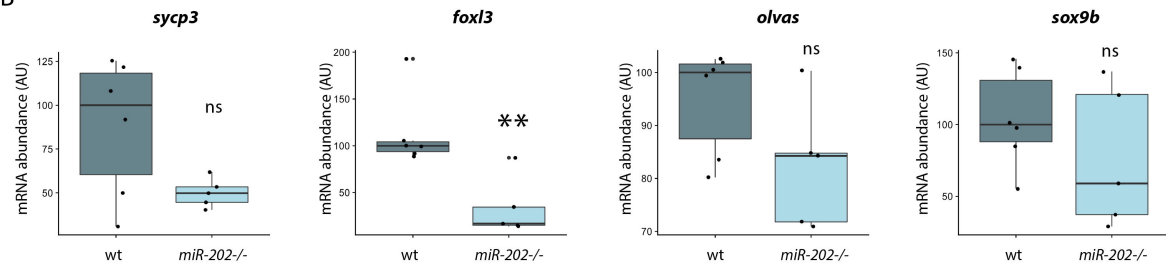

C

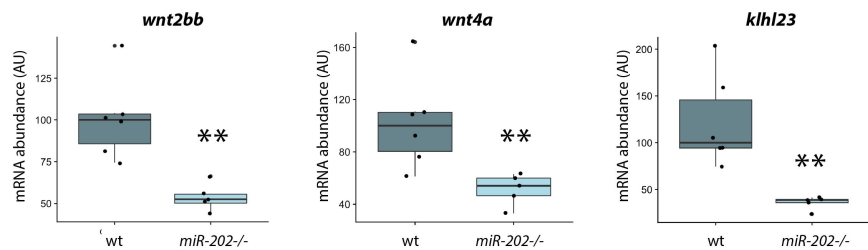

D

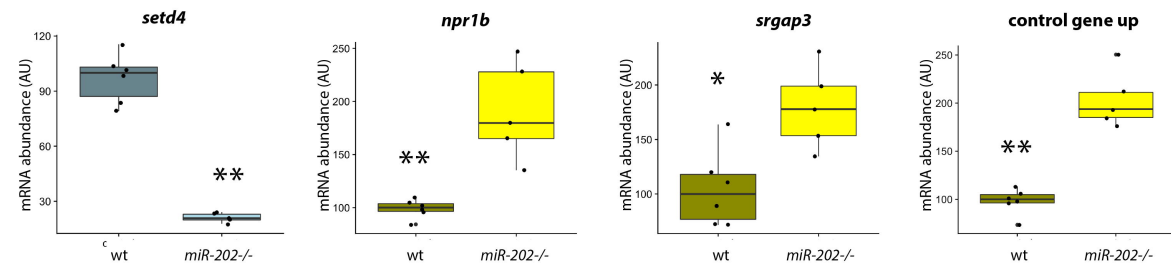

Source: https://www.biorxiv.org/content/10.1101/287359v1.full.pdf
